# Supplementary material
Source: Springer Nature journal article supplement (https://www.springermedizin.de/resource/supplementary/12986_2011_426_MOESM6_ESM.pdf/25656068)
Supplement: MOESM6 [file 25656068]

# Nutrition and inflammation

INFLAMMATION

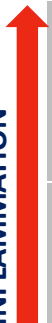

|                   |                                                                                                                                                                                                   |                                                                                                                                                                |                                                                                            |                                                                                                                               |
|-------------------|---------------------------------------------------------------------------------------------------------------------------------------------------------------------------------------------------|----------------------------------------------------------------------------------------------------------------------------------------------------------------|--------------------------------------------------------------------------------------------|-------------------------------------------------------------------------------------------------------------------------------|
| Working mechanism | Ratio ↑, LA↑:<br>-Lipoxins/resolvins/protectins↓<br>-Pro-inflam. cytokines↑ like IL6, TNFα, CRP<br>-via P450 → leukotoxins/diols → ROS ↑, AP-1 ↑<br>-Cell wall EPA, DHA↓<br>-Desaturase/elongase↓ | Hypoglycaemia, stress via SAM/HPA↑↑<br>Low grade inflammation<br>Immune suppression<br>Hyperinsulinemia - Androgens↑, IGF↑<br>GH↓, IL-6↑ etc<br>Empty calories | Body fat (VAT,SAT)↑<br>Insulin resistance↑<br>ROS↑<br>IL6↑<br>CRP↑<br>Leptin↑<br>Resistin↑ | Bind to gut, gut permeability ↑<br>-IMS activation<br>-Low grade inflammation<br>-Auto-immune diseases, via molecular mimicry |
| Nutrition         | Vegetable oils (not olive,coconut, cocoa)<br>Margarine,<br>Dairy,<br>Cereals,<br>Meat (not wild)<br>Nuts: peanuts, cashew                                                                         | Refined carbs (bread,potatoes, rice, etc)<br>Sugar (sweeties, cookies)                                                                                         | High calorie diet:<br>Calorie intake > Energy expenditure                                  | Harmful Saponins (legumes, cereals, soy, tomatoes, etc)<br>Lectins (cereals, legumes)<br>Gliadin (gluten)                     |
| Factors           | Ratio Ω6:Ω3                                                                                                                                                                                       | Glycemic index/load                                                                                                                                            | Calories                                                                                   | Anti-nutrients                                                                                                                |

RESOLUTION

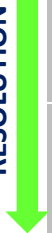

|                   |                                                                                                                           |                                                                                              |                                                                                             |                                                                                   |
|-------------------|---------------------------------------------------------------------------------------------------------------------------|----------------------------------------------------------------------------------------------|---------------------------------------------------------------------------------------------|-----------------------------------------------------------------------------------|
| Nutrition         | Fish<br>Walnuts<br>Flaxseed<br>Chloroplast –green leaves vegetables                                                       | Slow carbs: vegetables, nuts<br>GL ↓: fruit<br>Fibers↑                                       | Low calorie diet:<br>Calorie intake < Energy expenditure                                    | Avoid harmful saponins, lectins and gliadin                                       |
| Working mechanism | Ratio ↓, ALA↑:<br>-Lipoxins/resolvins/protectins↑<br>-Block pro-inflammatory cytokines production<br>-Cell wall EPA, DHA↑ | -Regulation of blood sugar and insulin levels:<br>Inflammation markers↓<br>-Micro nutrients↑ | Body fat (VAT,SAT)↓<br>Insulin resistance ↓<br>ROS↓<br>IL6↓<br>CRP↓<br>Leptin↓<br>Resistin↓ | Repair gut, avoid intestin permeability:<br>Foreign proteins in periphery ↓, IMS↓ |
